# Supplementary material
Source: PubMed Central journal article supplement (PMC4293349)
Supplement: NIHMS635622-supplement-3.pdf [file NIHMS635622-supplement-3.pdf]

**Supplementary Movie 1.** Real-time intravital two-photon microscopy showing distribution of bisphosphonate in 4T1 breast tumour. 72 $\mu$ m maximal intensity projection showing collagen in the tumour capsule and blood vessels (blue), TAMs (green) and bisphosphonate (red). Time stamp in hh:mm:ss:00 shows time relative to injection of bisphosphonate.

**Supplementary Movie 2.** Real-time intravital two-photon microscopy showing distribution of bisphosphonate in normal breast tissue in the fourth inguinal mammary fat pad. 72 $\mu$ m maximal intensity projection showing collagen in the connective tissue and blood vessels (blue), TAMs (green) and bisphosphonate (red). Time stamp in hh:mm:ss:00 shows time relative to injection of bisphosphonate.

**Supplementary Movie 3.** Real-time intravital two-photon microscopy showing pinocytosis of bisphosphonate by a TAM. Single optical plane showing a TAM (green) internalising bisphosphonate (red) in small vesicles. Time stamp in hh:mm:ss:00 shows time relative to injection of bisphosphonate.

**Supplementary Movie 4.** Real-time intravital two-photon microscopy showing phagocytosis of a large, granular clump of bisphosphonate by a TAM. Single optical plane showing a TAM (green) engulfing and internalising a large, bisphosphonate-containing granule (red). Time stamp in hh:mm:ss:00 shows time relative to injection of bisphosphonate.

**Supplementary Movie 5.** 3D reconstruction of 4T1 mammary tumour 24 hours after injection of bisphosphonate. 150 $\times$ 425 $\times$ 425 $\mu$ m volume showing tumour capsule (blue), TAMs (green) and bisphosphonate (red).
